# Supplementary material
Source: publisher figshare collection journal article supplement (https://diabetesjournals.figshare.com/articles/dataset/_/19607232)
Supplement: Supplementary file 2 [file 1]

## Electronic Supplemental Tables

**ESM Table 1**

| <b>Genes</b>                        | <b>Forward primer (5'→3')</b> | <b>Reverse Primer (5→3')</b> |
|-------------------------------------|-------------------------------|------------------------------|
| <i>Mfn1</i>                         | TGGTAATCTTTAGCGGTGCTC         | GGAGGACTTTATCCCACAGC         |
| <i>Mfn2</i>                         | TTTGGAAGTAGGCAGTCTCCA         | CAGGCAGCACTGAAAAGAGA         |
| <i>Pdx1-<br/>Cre<sup>ERT2</sup></i> | CAGGCGTTTTCTGAGCATACC         | CCGGTTATTCAACTTGCACCAT       |

Sequence of primers used for genotyping *Mfn1* and *Mfn2* flox.

**ESM Table 2**

| <b>Genes</b>    | <b>Forward primer (5'→3')</b> | <b>Reverse Primer (5'→3')</b> |
|-----------------|-------------------------------|-------------------------------|
| <i>Mfn1</i>     | GCATTTTTTTGGCAGGACAAGTAG      | GGAGGACTTTTATCCCACAGCAT       |
| <i>Mfn2</i>     | AGAAGAGTGTCAAGACTGTGAACCA     | GCTGCCTGCATGCAACTG            |
| <i>Drp1</i>     | TCAGATCGTCGTAGTGGGAA          | TCTTCTGGTGAAACGTGGAC          |
| <i>Opa1</i>     | ATACTGGGATCTGCTGTTGG          | AAGTCAGGCACAATCCACTT          |
| <i>Fis1</i>     | AAGTATGTGCGAGGGCTGT           | TGCCTACCAGTCCATCTTTC          |
| <i>Ins2</i>     | TGGCTTCTTCTACACACCCATGTCCC    | ACTGATCTACAATGCCACGCTTCTGCT   |
| <i>Slc2a2</i>   | GCAACTGGGTCTGCAATTTTG         | CAAGGAAGTCCGCAATGTACTG        |
| <i>Gck</i>      | TGGTGGATGAGAGCTCAGTGAA        | CATGTACTTTCCGCCAATGATC        |
| <i>Pdx1</i>     | CCAAAGCTCACGCGTGGA            | TGTTTTCTCGGGTTCCG             |
| <i>Nkx6.1</i>   | GCCTGTACCCCCCATCAAG           | GTGGGTCTGGTGTGTTTTCTCTT       |
| <i>Pax6</i>     | GCACATGCAAACACACATGAAC        | GGTGAAATGAGTCCTGTTGAAGTG      |
| <i>Ucn3</i>     | GCTGTGCCCTCGACCT              | TGGGCATCAGCATCGCT             |
| <i>Glp1r</i>    | CCCTGGGCCAGTAGTGTG            | GCAGGCTGGAGTTGTCCTTA          |
| <i>Nkx2.2</i>   | CCTCCCCGAGTGGCAGAT            | GAGTTCTATCCTCTCCAAAAGTTCAA    |
| <i>Gcg</i>      | TCACAGGGCACATTCACCAG          | CATCATGACGTTTGGCAATGTT        |
| <i>Arx</i>      | TCCGGATACCCCACTTAGCTT         | GACGCCCTTTTCTTTAAGTG          |
| <i>Mafa</i>     | CTTCAGCAAGGAGGAGGTCATC        | CGTAGCCGCGGTTCTTGA            |
| <i>Mafb</i>     | TGAATTTGCTGGCACTGCTG          | AAGCACCATGCGGTTCATACA         |
| <i>Vdac1</i>    | GCTAAGGATGACTCGGCTTTAAGG      | AGGTTAAGTGATGGGCTAGGATGG      |
| <i>Vdac2</i>    | TCACTGTTGGCTGGTTCCTAGTTG      | AAGACCTCGTGGATTATGCTAGGG      |
| <i>Vdac3</i>    | CACTTGTCCCTGGAAATGAAGAG       | CATGACACTACGTTGTTGCTGAGG      |
| <i>Letm1</i>    | TCCTGCGTTTCCAGCTCACCAT        | GTCTTCTGTGACACCGAGAGCT        |
| <i>Slc8a1</i>   | CCGTGACTGCCGTTGTGTT           | GCCTATAGACGCATCTGCATACTG      |
| <i>Trpm5</i>    | CCAGCATAAGCGACAACATCT         | GAGCATACAGTAGTTGGCCTG         |
| <i>Beclin-1</i> | TGGAAGGGTCTAAGACGT            | GGCTGTGGTAAGTAATGGA           |
| <i>Lc3</i>      | CACTGCTCTGTCTTGTGTAGGTTG      | TCGTTGTGCCTTTATTAGTGCATC      |
| <i>Bnip3</i>    | TTCCACTAGCACCTTCTGATGA        | GAACACCGCATTTACAGAACAA        |
| <i>p62</i>      | CCCAGTGTCTTGGCATTCTT          | AGGGAAAGCAGAGGAAGCTC          |

|                   |                         |                             |
|-------------------|-------------------------|-----------------------------|
| <i>GabarapL</i>   | CATCGTGGAGAAGGCTCCTA    | ATACAGCTGGCCCATGGTAG        |
| <i>CathepsinL</i> | GTGGACTGTTCTCACGCTCAAG  | TCCGTCCTTCGCTTCATAGG        |
| <i>Pink1</i>      | TGAGGAGCAGACTCCCAGTT    | AGTCCCCTCCACAAGGATG         |
| <i>Parkin</i>     | TGGAAAGCTCCGAGTTCAGT    | CCTTGTCTGAGGTTGGGTGT        |
| <i>Atf4</i>       | GCAGTGTTGCTGTAACGGACA   | CGCTGTTCAGGAAGCTCATCT       |
| <i>Atf6a</i>      | GACTCACCCATCCGAGTTGTG   | CTCCCAGTCTTCATCTGGTCC       |
| <i>Bip</i>        | AGGACAAGAAGGAGGATGTGGG  | ACCGAAGGGTCATTCCAAGTG       |
| <i>Chop2</i>      | CCACCACACCTGAAAGCAGAA   | AGGTGAAAGGCAGGGACTCA        |
| <i>Xbp1</i>       | TGGCCGGGTCTGCTGAGTCCG   | GTCCATGGGAAGATGTTCTGG       |
| <i>Xbp1s</i>      | CTGAGTCCGAA TCAGGTGCAG  | GTCCATGGGAAGATGTT CTGG      |
| <i>Cx36</i>       | CAGCAGCACTCCACTATGATTG  | GTACACCGTCTCCCCTACAA        |
| <i>Ldha</i>       | ATGAAGGACTTGCGGATGA     | ATCTCGCCCTTGAGTTTGTCTT      |
| <i>Slc16a1</i>    | GCTTGGTGACCATTGTGGAAT   | CCCAGTACGTGTATTTGTAGTCTCCAT |
| <i>Pdgfra</i>     | GACCCTGTTCCAGAGGAGGAA   | TTCCGAAGTCTGTGAGCTGTGT      |
| <i>Aldh1a3</i>    | GGGCCTCAGATCGACCAAAA    | CTAGCTTGGCCCCTTCCTTC        |
| <i>Hsd11b</i>     | GGAGCCGCACTTATCTGA      | TGCCATTTCTCTTCCAATC         |
| <i>Mt9/mt11</i>   | GAGCATCTTATCCACGCTTCC   | GGTGGTACTCCCGCTGTAAA        |
| <i>Ndufv1</i>     | CTTCCCCACTGGCCTCAAG     | CCAAAACCCAGTGATCCAGC        |
| <i>Epac1a</i>     | GGACAAAGTCCCCTACGACA    | CTTGGTCCAGTGGTCCTCAT        |
| <i>Epac2a</i>     | TGGAACCAACTGGTATGCTG    | CCAATTCCCAGAGTGCAGAT        |
| <i>Epac2b</i>     | TCTTTGCTACCTGGGACTGG    | AGCAGCCAGCCTTTATCTGA        |
| <i>Adcy3</i>      | GTGCTATCATCGTGGGCATC    | TCCTTCAGCATCTCGTCAGC        |
| <i>Adcy5</i>      | GCCAATGCCATAGACTTCAG    | ATCTCCTCCTTCTCTTCTGTG       |
| <i>Adcy6</i>      | TAAATGCCAGCACCTATGACC   | TGTTCAACCCGA TCTTCA TCTG    |
| <i>Adcy8</i>      | TTGGGCTTCCTACACCTTGACT  | CGGTAGCTGTATCCTCCATTGAG     |
| <i>Prkar1a</i>    | ATGGCGTCTGGCAGTATGG     | GCTGCACGATGGAGTCCTTC        |
| <i>Prkar1b</i>    | TCTGAAAGGATGCGAGATGTACG | CTGGGAGTTTGACTTCTGCCG       |
| <i>Prkar2a</i>    | GAGGAGGATAACGATCCAAGGG  | TGCTCGTCAGTTTTGACAATCTT     |
| <i>Prkaca</i>     | AGATCGTCCTGACCTTTGAGT   | GGCAAAACCGAAGTCTGTAC        |
| <i>Prkacb</i>     | CTCGGGACGGGTTTCCTTTG    | AGGGACGTATTCCATAACCATGT     |

*β-actin*      CGAGTCGCGTCCACCC

CATCCATGGCGAACTGGTG

---

List of primers used for qRT-PCR.

**ESM Table 3**

| <b>Antibody</b>               | <b>Species</b> | <b>Vendor</b>   | <b>Catalog number</b> | <b>Dilution/conc</b> | <b>RRID</b>      |
|-------------------------------|----------------|-----------------|-----------------------|----------------------|------------------|
| anti-MFN1                     | mouse          | Abcam           | ab126575              | 1 in 500             | RRID:AB_11141234 |
| anti-MFN2                     | mouse          | Abcam           | ab56889               | 1 in 500             | RRID:AB_2142629  |
| anti-GAPDH                    | goat           | Cell signalling | #2118s                | 1 in 10 000          | RRID:AB_561053   |
| anti-HRP                      | goat           | Abcam           | ab205719              | 1 in 5 000           | RRID:AB_2755049  |
| <b><i>βMfn1/2</i> dKO IHC</b> |                |                 |                       |                      |                  |
| anti-Insulin                  | guinea pig     | Agilent         | #A0564                | 1 in 500             | RRID:AB_10013624 |
| anti-glucagon                 | mouse          | Sigma-Aldrich   | G2654                 | 1 in 1 000           | RRID:AB_259852   |
| Alexa Fluor 488               | goat           | Fisher Thermo   | #A-11073              | 1 in 1 000           | RRID:AB_2534117  |
| Alexa Fluor 568               | goat           | Fisher Thermo   | #A-11004              | 1 in 1 000           | RRID:AB_2534072  |
| <b>Pdx1CreER IHC</b>          |                |                 |                       |                      |                  |
| anti-Insulin                  | guinea pig     | Agilent         | #A0564,               | 1 in 2 000           | RRID:AB_10013624 |
| anti-glucagon                 | rabbit         | Abcam           | ab92517               | 1 in 300             | RRID:AB_10561971 |
| anti-somatostatin             | rabbit         | Abcam           | ab111912              | 1 in 1 000           | RRID:AB_10903864 |
| Alexa Fluor 488               | donkey         | Jackson Immuno  | #711-545-152          | 1 in 1 000           | RRID:AB_2313584  |
| Alexa Fluor 568               | donkey         | Jackson Immuno  | #706-165-148          | 1 in 1 000           | RRID:AB_2340460  |

List of antibodies used in immunohistochemistry (IHC) experiments.

**ESM Table 4**

| <b>Condition</b> | <b>Ctrl Average</b> | <b>±SEM</b> | <b>dKO Average</b> | <b>±SEM</b> |
|------------------|---------------------|-------------|--------------------|-------------|
| 3G               | 225.130794          | 31.9313528  | 137.3442788        | 16.5058023  |
| 10G              | 350.937357          | 99.2151864  | 238.6717601        | 47.844241   |
| 17G              | 1007.68015          | 144.488618  | 302.4013885        | 79.2604199  |
| EX4              | 1019.23968          | 204.149417  | 820.6378323        | 21.4037722  |
| GLP1             | 982.176667          | 3.3427251   | 833.1233333        | 55.4545809  |
| GIP              | 927.603             | 3.5275689   | 732.67             | 20.5050002  |
| FSK              | 864.981483          | 8.97886477  | 783.514548         | 31.6922934  |
| IBMX             | 866.672401          | 23.8144433  | 711.4497483        | 15.3320754  |
| KCl              | 657.561878          | 107.611853  | 284.9369204        | 51.8648557  |
| 3G+30mM KCl      | 238.214722          | 103.220044  | 196.2304897        | 8.12945181  |
| 17G+30mM KCl     | 920.67843           | 30.819347   | 907.6114857        | 5.17694852  |
| 10G+H89          | 513.305815          | 157.535336  | 808.3442542        | 15.0070073  |
| IBMX/FSK         | 1312.07246          | 152.327607  | 1161.305076        | 13.6682706  |
| IBMX/FSK/H89     | 1641.45142          | 83.8140161  | 1314.467588        | 173.287437  |
| 10G+activ        | 918.086618          | 52.9726612  | 870.8674045        | 53.8147534  |
| 10G+activ+H89    | 892.469171          | 48.2800591  | 1534.612807        | 90.3019959  |

Total insulin content measured per GSIS condition (ng/10 islets).

**ESM Table 5**

| <b>Metabolites</b> | <b>Abbreviations</b>          | <b>control mean</b> | <b>dKO mean</b> | <b>log<sub>2</sub> (fold change)</b> | <b>Student t-test (p value)</b> |
|--------------------|-------------------------------|---------------------|-----------------|--------------------------------------|---------------------------------|
| AADA               | Aminoadipic acid              | 1909.1              | 699.12          | -1.4493                              | 0.1347                          |
| a(R)-OHB/a(S)-OHB  | Alpha-hydroxybutyric acid     | 2000.2              | 2105.2          | 0.0738                               | 0.9064                          |
| ADMA/SDMA          | (A)symmetric dimethylarginine | 151.88              | 152.32          | 0.0042                               | 0.9968                          |
| Ala                | Alanine                       | 50606               | 35866           | -0.4967                              | 0.3161                          |
| β-OHB              | β-hydroxybutyric acid         | 3990.9              | 5578.9          | 0.4833                               | 0.4692                          |
| CA                 | Cholic acid                   | 1181.3              | 4177.4          | 1.8222                               | 0.1482                          |
| CDCA               | Chenodeoxycholic acid         | 327.1               | 348.92          | 0.0931                               | 0.2608                          |
| Cit                | Citrulline                    | 6926.6              | 6273.8          | -0.1428                              | 0.5838                          |
| DCA                | Deoxycholic acid              | 216.51              | 252.52          | 0.222                                | 0.266                           |
| GBB                | Gamma-butyrobetaine           | 801.64              | 760.72          | -0.0756                              | 0.6991                          |
| GCA                | Glycocholic acid              | 547.92              | 655.65          | 0.259                                | 0.0166                          |
| Gln                | Glutamine                     | 97592               | 93082           | -0.0683                              | 0.7184                          |
| Glu                | Glutamic acid                 | 21063               | 17968           | -0.2293                              | 0.5822                          |
| Gly                | Glycine                       | 20756               | 16462           | -0.3344                              | 0.1185                          |
| GUDCA              | Glycoursodeoxycholic acid     | 492.84              | 492.78          | -0.0002                              | 0.8557                          |
| HCit               | Homocitrulline                | 991.28              | 979.06          | -0.0179                              | 0.3277                          |
| Ile                | Isoleucine                    | 14195               | 19491           | 0.4575                               | 0.0196                          |
| IndS               | Indoxyl sulfate               | 8683.7              | 6507.5          | -0.4162                              | 0.119                           |
| Kynu               | Kynurenine                    | 714.87              | 729.99          | 0.0302                               | 0.4022                          |
| Leu                | Leucine                       | 17020               | 21708           | 0.351                                | 0.029                           |
| N-MNA              | N-methylnicotineamide         | 547.54              | 547.58          | 1E-04                                | 0.3752                          |
| Phe                | Phenylalanine                 | 11509               | 11749           | 0.0298                               | 0.8802                          |
| Taurine            | Taurine                       | 128076              | 100512          | -0.3496                              | 0.4514                          |
| TCA                | Taurocholic acid              | 30302               | 110668          | 1.8687                               | 0.0522                          |
| TDCA/TCDCA         | Tauro(cheno)deoxycholic acid  | 723.01              | 1904.5          | 1.3973                               | 0.0056                          |
| Trp                | Tryptophan                    | 8152.9              | 8051.9          | -0.018                               | 0.9343                          |
| TUDCA              | Tauroursodeoxycholic acid     | 548.74              | 640.49          | 0.223                                | 0.3052                          |
| Tyr                | Tyrosine                      | 12364               | 12391           | 0.0031                               | 0.9929                          |
| UDCA               | Ursodeoxycholic acid          | 418.55              | 437.05          | 0.0624                               | 0.2671                          |

Metabolite differences found in plasma samples of control vs dKO mice according to metabolic class and both fold-change and t-test criteria.

## Supplemental Figure legends

### **Supplemental Fig.1 Boxplots showing differences between HFHS (yellow) and RC (green) diet in 6 mouse strains over time for *Mfn1* (A) and *Mfn2* (B) genes.**

The bottom and top of the boxes represent the first and third quartiles, with the horizontal line representing the median. The upper whiskers represent the third quartile plus 1.5x IQR (interquartile range); the lower whiskers represent the first quartile minus 1.5x IQR. Outlier points beyond this range are indicated above or below the whiskers. Statistically significant comparisons following false discovery rate (FDR) correction ( $FDR \leq 0.05$ ) are indicated by a double asterisk. Marginally significant comparisons (raw p value  $\leq 0.05$ ) are indicated by a single asterisk.

### **Supplemental Fig.2 Pdx1CreER activation has no detectable effect on glycaemia both *in vivo* and *in vitro* and on key beta-cell gene expression and islet morphology.**

(A) Glucose tolerance measured by IPGTT (2 g/kg body weight) in WT and Pdx1CreER mice ( $n=6$  mice per genotype) at 8 weeks of age. (B) Insulin secretion measured during serial incubations in batches in 3 or 20 mmol/l glucose ( $n=6$  mice per genotype in three independent experiments) at 8 weeks of age. (C) (a,b) MafA (red) and insulin (green) expression levels in WT and Pdx1CreER islets. (c,d) Typical distribution of beta- (insulin, red), alpha- (glucagon, green), and delta-cells (Somatostatin, SS, green) in 8-week old islet sections ( $n= 50$  islets, 3 male mice per genotype). Note that both alpha and delta cells were unidentifiable as these were stained in green. Scale bar: 20  $\mu$ m. Data are presented as mean $\pm$ SD. Data assessed by two-way ANOVA test and Sidak's multiple comparisons test.

### **Supplemental Fig.3 Body weight loss, insulin resistance and increased $\beta$ -ketone production is observed in $\beta$ *Mfn1/2* dKO mice.**

(A) qRT-PCR quantification of *Mfn1*, *Mfn2* expression in tissues extracted from control and dKO animals relative to  $\beta$ -actin ( $n=3-5$  mice per genotype in two independent experiments). (B) Measured body weight in control and  $\beta$ *Mfn1/2* dKO mice ( $n=3-6$  mice per genotype) at 7-22 weeks of age. (C) Glucose tolerance measured by IPGTT (1 g/kg body weight) in 20-week-old mice in  $\beta$ *Mfn1/2* dKO and control mice ( $n=8$  mice per genotype, in 2 independent experiments). (D) Challenging  $\beta$ *Mfn1/2* dKO mice with a 0.75 U/kg body weight insulin injection as compared with control mice at 14 weeks of age ( $n=6$  mice per genotype).



Data normalised to baseline (%). (E) Plasma insulin levels during IPGTT of 3g/kg of glucose in dKO and control mice ( $n=5$  mice per genotype) (F) Proinsulin to insulin ratio measured in  $n=5$  mice per genotype. (G) Glucose and (H)  $\beta$ -ketone bodies measured before or after an overnight (16h) fasting in 14-week control and dKO mice. (I) Plasma insulin levels were quantified under fed and fasted conditions in 14-week dKO and control mice ( $n=6$  mice per genotype). Data are presented as mean $\pm$ SD. \* $p<0.05$ ; \*\* $p<0.01$ ; \*\*\* $p<0.001$ ; \*\*\*\* $p<0.0001$  as indicated, or at the time points indicated analysed by unpaired two-tailed Student's t-test and Mann–Whitney correction or two-way ANOVA test and Sidak's multiple comparisons test. Experiments were performed in 14 or 20-week-old male mice as stated accordingly.

**Supplemental Fig.4  $\beta$ Mfn1/2 dKO mice show impaired glucose tolerance and insulin secretion at 14 and 20 weeks of age following an IP injection of glucose versus an OG.** (A) Glucose tolerance measured by IPGTT (using 1g/kg body weight) in  $\beta$ Mfn1/2 dKO and control mice at 14 weeks of age. (B) Plasma insulin levels during IPGTT in dKO and control mice. (C) Glucose tolerance measured by IPGTT (using 1g/kg body weight) in  $\beta$ Mfn1/2 dKO and control mice at 20 weeks of age. (D) Plasma insulin levels during IPGTT in dKO and control mice ( $n=5-6$  mice per genotype). (E) Glucose tolerance measured by OGTT (using 1g/kg body weight) in  $\beta$ Mfn1/2 dKO and control mice at 14 weeks of age. (F) Plasma insulin levels during IPGTT in dKO and control mice. (G) Glucose tolerance measured by OGTT (using 1g/kg body weight) in  $\beta$ Mfn1/2 dKO and control mice at 20 weeks of age. (H) Plasma insulin levels during IPGTT in dKO and control mice ( $n=5-6$  mice per genotype). Data are presented as mean $\pm$ SEM. \* $p<0.05$  as indicated, analysed by two-way ANOVA test and Sidak's multiple comparisons test.

**Supplemental Fig.5 Mitochondrial ultrastructure, glycaemia and beta cell mass are not altered 2 weeks post tamoxifen administration in  $\beta$ Mfn1/2 dKO mice.** (A) Confocal images of the mitochondrial network of dissociated beta cells stained with Mitotracker green; scale bars: 5  $\mu$ m. (B) Mitochondrial morphology analysis on deconvolved confocal images of dissociated beta cells. A macro was developed to quantify the number of mitochondria per cell and measure the elongation, perimeter, circularity (0: elongated; 1: circular mitochondria), density and surface area of the

organelles in control and dKO animals ( $n=20-50$  cells;  $n=3$  mice per genotype). (C) Blood glycaemia measured in fed mice before or 2 weeks post-tamoxifen injection in control and dKO mice ( $n=7$  mice per genotype). (D) Glucose tolerance measured by IPGTT (3 g/kg body weight) in 10-week-old  $\beta Mfn1/2$  dKO and control mice ( $n=7$  mice per genotype). (E) Plasma insulin levels were quantified under fasted conditions in 10-week dKO and control mice ( $n=7$  mice per genotype). (F) The beta cell and alpha cell surface (G) measured within the whole pancreatic area in control and dKO mice were determined, as well as the beta/alpha cell ratio in (H), ( $n=67-76$  islets, 3 mice per genotype; experiment performed in duplicate). (I) The relative mitochondrial DNA copy number was measured by determining the ratio of the mtDNA-encoded gene *mt-Nd1* to the nuclear gene *Ndufv1* ( $n=3$  mice per genotype). Data are presented as mean $\pm$ SD. \* $p<0.05$ , \*\* $p<0.01$  as indicated, analysed by unpaired two-tailed Student's t-test and Mann–Whitney correction or two-way ANOVA test and Sidak's multiple comparisons test. Experiments were performed in 10-week-old male mice.

**Suppl. Fig.6 Heatmap of differential gene expression between  $\beta Mfn1/2$  dKO and control islet mRNA.** Changes in key beta or alpha cell genes, disallowed genes, mitochondrial, ER stress or mito/autophagy genes were assessed by qRT-PCR in control and dKO islets according to the colour coded median values from 0 to 1, white to dark blue respectively ( $n=3-4$  mice per genotype; experiment performed in duplicate). Expression values for each gene were normalised to  $\beta$ -actin. \* $p<0.05$ ; \*\* $p<0.01$ , assessed by two-way ANOVA test and Sidak's multiple comparisons test. Experiments were performed in 14-week-old male mice.

**Supplemental Fig.7 Impact of *Mfn1/2* deletion on intercellular connectivity.** (A) Representative cartesian maps of islets with colour coded lines connecting cells according to the strength of Pearson analysis (colour coded  $r$  values from 0 to 1, blue to red respectively) under 3mmol/L (3G), 17mmol/L (17G) glucose or 20mmol/L KCl; scale bars: 40  $\mu$ m.(B) Representative heatmaps depicting connectivity strength ( $r$ ) of all cell pairs according to the colour coded  $r$  values from 0 to 1, blue to yellow respectively.(C) Percentage of correlated cell pairs at 3G, 17G or KCl ( $n=17-26$  islets, 4 mice per genotype).(D)  $r$  values between beta cells in response to glucose or KCl ( $n=4$  mice per genotype).(E) qRT-PCR quantification of Cx36 expression relative to  $\beta$ -

*actin* ( $n=3-4$  mice per genotype in two independent experiments). Data are presented as mean $\pm$ SD. \* $p<0.05$ , assessed by unpaired two-tailed Student's t-test and Mann–Whitney correction or two-way ANOVA test and Sidak's multiple comparisons test. Analysis and experiments were performed on data collected from 14-week-old male mice.

**Supplemental Fig.8 Impaired insulin secretion observed in *Clec16a* $\Delta$ *panc* islets can be rescued by GLP-1R agonists *in vitro*.** (A) Insulin secretion measured in control (Pdx1-Cre) and *Clec16a* $\Delta$ *panc* mice in 3 mmol/l glucose (3G), 17 mmol/l glucose (17G), or 10 nmol/l exendin-4 (ex4) ( $n=4$  mice per genotype). (B) Glucose tolerance measured by IPGTT (1.5 g/kg body weight) in 8-week-old male Pdx1-Cre and *Clec16a* $\Delta$ *panc* mice or OGTT (1.5 g/kg body weight) in 9–10-week-old animals. (C) The corresponding AUC is shown in (B) ( $n=4-5$  mice per genotype). (\* $p<0.05$ , \*\* $p<0.01$ , control OGTT vs *Clec16a* $\Delta$ *panc*; # $p<0.05$ , ## $p<0.01$ , control IPGTT vs *Clec16a* $\Delta$ *panc*). Data are presented as mean $\pm$ SD and assessed by two-way ANOVA test and Sidak's multiple comparisons test.

**Supplemental Fig.9 Insulin granule density is increased in  $\beta$ *Mfn1/2* dKO beta cells.** (A) Confocal images of NPY-Venus fluorescence in dissociated fixed pancreatic beta cells isolated from control and dKO mice. Scale bar: 10  $\mu$ m. (B) Effect of KCl on exocytosis as reported with NPY-Venus in pancreatic beta cells. Traces represent mean normalised fluorescence intensity over time ( $F/F_{min}$ ). (C) Confocal images of ZIMIR fluorescence imaging in dissociated pancreatic beta cells isolated from control and dKO mice. Scale bar: 10  $\mu$ m. (D) Representative time courses of ZIMIR signal fold change above baseline ( $F/F_{min}$ ) upon KCl-stimulated insulin/ $Zn^{2+}$  release and (E) fold change of peaks in dissociated control and dKO cells. ( $n=19$  cells from 3 control mice;  $n=12$  cells from 3  $\beta$ *Mfn1/2* dKO mice). Data are presented as mean $\pm$ SD. \* $p<0.05$ , \*\* $p<0.01$ ; assessed by unpaired two-tailed Student's t-test and Mann–Whitney correction or two-way ANOVA test and Sidak's multiple comparisons test. Experiments were performed in 14-week-old male mice.

**Supplemental Fig.10 Volcano plots showing alterations in metabolites and lipids from plasma samples of control and  $\beta$ *Mfn1/2* dKO mice.** (A) Volcano plot summarising both fold-change and t-test criteria for all metabolites. Results are

summarised in a scatter-plot of the negative  $\log_{10}$ -transformed p values from the t-test plotted against the  $\log_2$  fold change. Negative values indicate downregulated metabolites in dKO mice, while positive values reflect upregulated metabolites. Metabolites with statistically significant differential levels according to the t-test lie above a horizontal threshold line (red dots). Metabolites with large fold-change values lie far from the vertical threshold line at  $\log_2$  fold change = 0, indicating whether the metabolite is up or downregulated. The list of analysed metabolites with their abbreviations is presented in ESM table 5. (B) Lipids that were found downregulated in dKO mice with statistically significant differential levels according to the t-test are presented above a horizontal threshold line. Plasma samples were isolated from  $n=3$  animals per genotype. The most significantly downregulated lipids are annotated. SM, sphingomyelins; CER, ceramide; CE, cholesterol esters; DG, di(acyl/alkyl)glycerols; FA, fatty acids; TG, tri(acyl/alkyl)glycerols; LPC, lysophosphatidylcholines; PC, phosphatidylcholines; LPE, lysophosphatidylethanolamines; PE, phosphatidylethanolamines; PG, phosphatidylglycerols; PI, phosphatidylinositols; PS, phosphatidylserines. Experiments were performed in 14-week-old male mice.

**Supplemental Fig.11 Impact of Mfn1/2 deletion on glucose and incretin stimulated-insulin secretion in beta cells.** (A) In control animals, glucose is taken up by beta cells through GLUT2 and metabolised by mitochondria (elongated structure) through the citrate (TCA) cycle, leading to an increased mitochondrial proton motive force (hyperpolarised  $\Delta\psi_m$ ), accelerated ATP synthesis and  $O_2$  consumption rate (OCR). Consequently, the cytoplasmic ATP:ADP ratio rises, which causes closure of KATP channels, depolarisation of plasma membrane potential ( $\psi_m$ ), opening of VDCCs and influx of cytosolic  $Ca^{2+}$ . Elevated  $[Ca^{2+}]_{cyt}$  triggers a number of ATP-dependent processes including insulin secretion and improved beta-beta cell communication through connexin 36 (Cx36). (B) Following *Mfn1/2* deletion ( $\beta$ Mfn1/2 dKO), highly fragmented mitochondria were associated with reduced mitochondrial  $Ca^{2+}$  ( $[Ca^{2+}]_m$ ) accumulation, leading to a less polarised  $\Delta\psi_m$ , weaker OCR, lower mtDNA copy number and decreased ATP synthesis. This is expected to result in weaker  $\psi_m$  depolarisation, cytosolic  $Ca^{2+}$  influx and beta-beta cell connectivity due to lower expression of Cx36. Despite observing a higher number of docked insulin granules on the plasma membrane, insulin secretion was highly suppressed in these animals. This was also associated with increased beta cell death and reduced beta

cell mass. (C) In response to incretins, insulin secretion is potentiated through the activation of GLP1-R and cAMP signalling involving PKA- and EPAC-dependent pathways. Elevated  $[Ca^{2+}]_{cyt}$  triggers a number of ATP-dependent processes including insulin secretion and  $Ca^{2+}$  mobilisation into the endoplasmic reticulum (ER). (D) In  $\beta Mfn1/2$  dKO cells, activation of the GLP1-R is linked with a potentiation of the EPAC pathway (inhibited by PKA), an increased ER  $Ca^{2+}$  uptake and improved beta-beta cell communication. Red and bold arrows represent enhanced pathways; dashed arrows represent impaired pathways. This figure was produced using illustrations from Servier Medical Art, <http://smart.servier.com/>

## **ESM Videos**

### **ESM Video 1**

Fluorescence imaging of cytosolic  $\text{Ca}^{2+}$  oscillations using Cal-520 in control (left) and  $\beta\text{Mfn1/2}$  dKO (right) whole islets in response to 3G, 3 mmol/l glucose, 17 mmol/l glucose (17G; with or without diazoxide [diaz]) or 20 mmol/l KCl with diaz. Scale bars: 50 $\mu\text{m}$ .

### **ESM Video 2**

Fluorescence imaging of mitochondrial  $\text{Ca}^{2+}$  oscillations using R-GECO in control (left) and  $\beta\text{Mfn1/2}$  dKO (right) whole islets in response to 3G, 3 mmol/l glucose, 17 mmol/l glucose (17G; with or without diazoxide [diaz]) or 20 mmol/l KCl with diaz. Scale bars: 50 $\mu\text{m}$ .

### **ESM Video 3**

Changes in  $[\text{Ca}^{2+}]_{\text{ER}}$  were measured by fluorescence imaging of cytosolic  $\text{Ca}^{2+}$  oscillations using Cal-520 in control (left) and  $\beta\text{Mfn1/2}$  dKO (right) whole islets in response to 3G, 3 mmol/l glucose, 17 mmol/l glucose (17G; with or without diazoxide [diaz] or Acetylcholine [Ach]) or 20 mmol/l KCl with diaz. Scale bars: 50 $\mu\text{m}$ .

### **ESM Video 4**

Fluorescence imaging of cytosolic  $\text{Ca}^{2+}$  oscillations using Cal-520 in control (left) and  $\beta\text{Mfn1/2}$  dKO (right) whole islets in response to 3G, 3 mmol/l glucose, 10 mmol/l glucose (10G; with or without Exendin-4 [ex4]) or 20 mmol/l KCl. Scale bars: 50 $\mu\text{m}$ .
