# Supplementary material
Source: publisher figshare collection journal article supplement (https://diabetesjournals.figshare.com/articles/dataset/_/19607232)

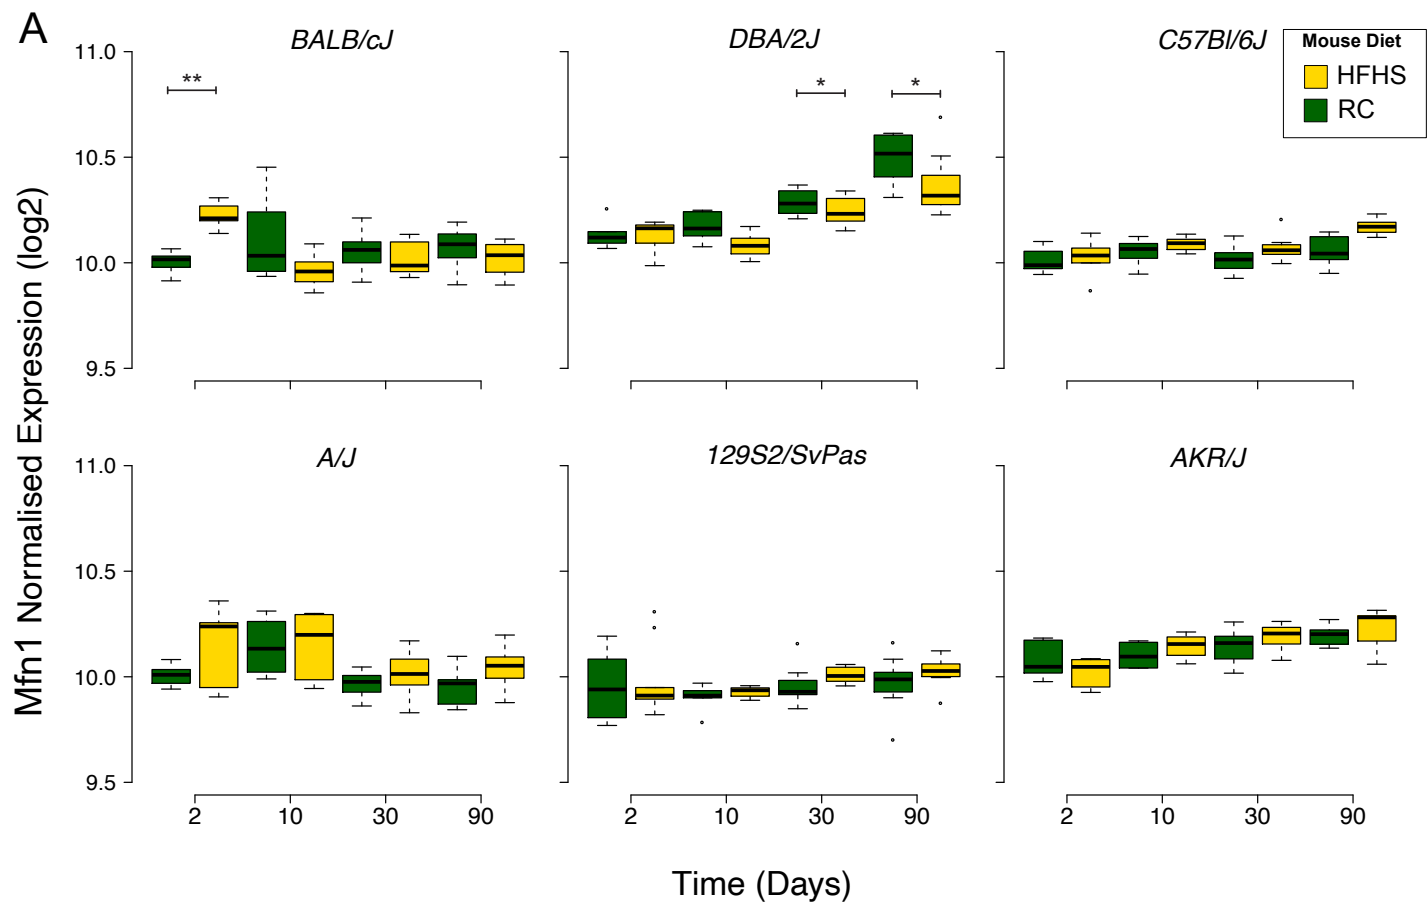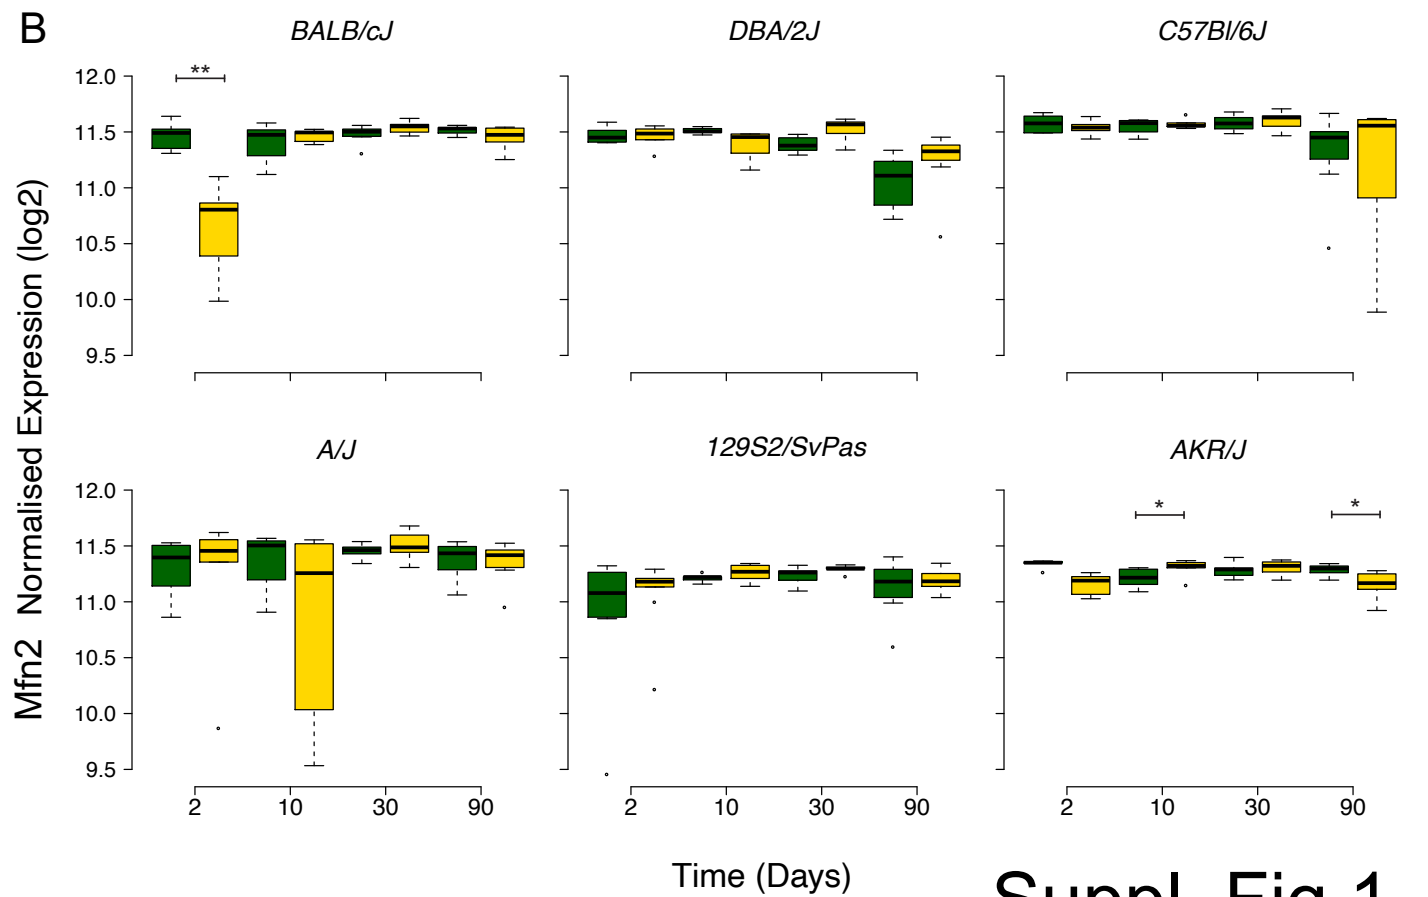

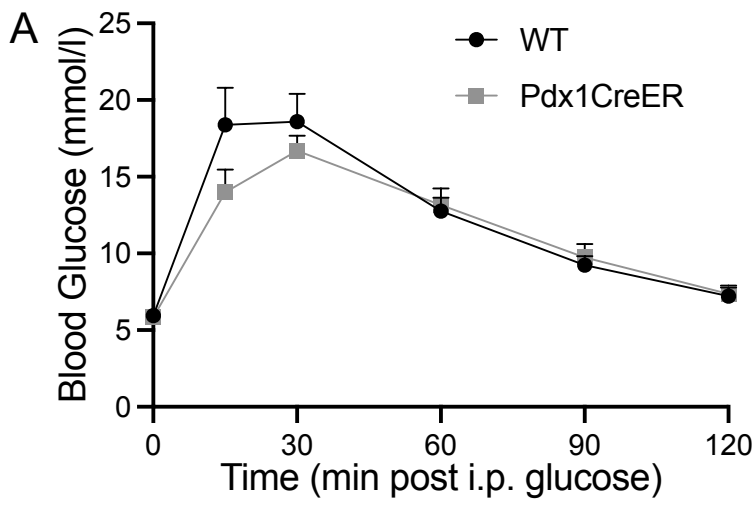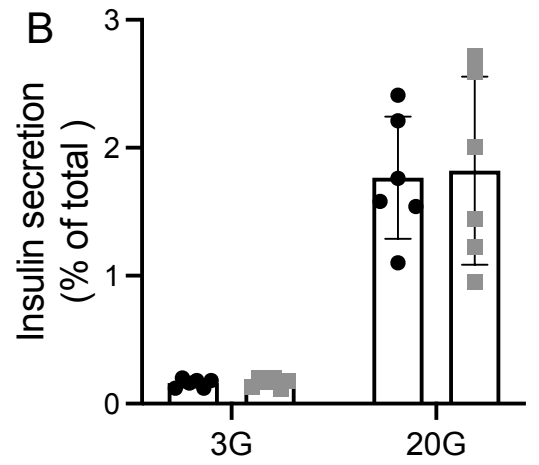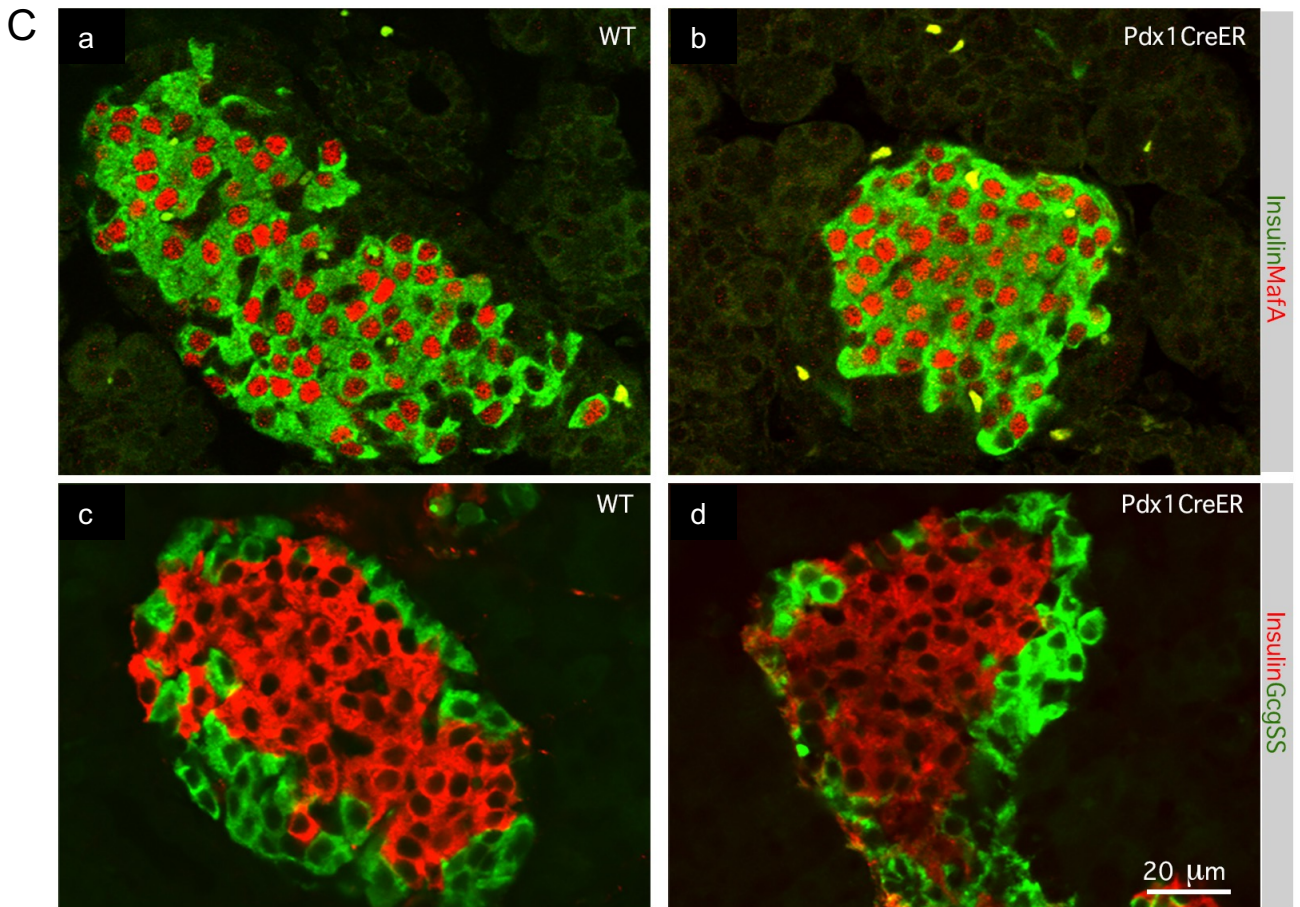

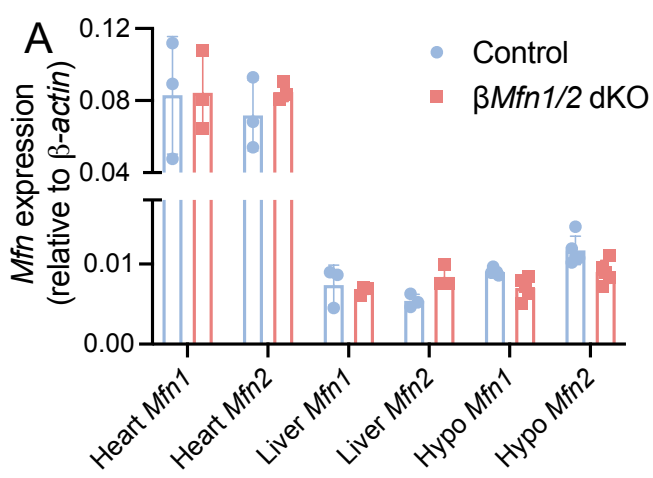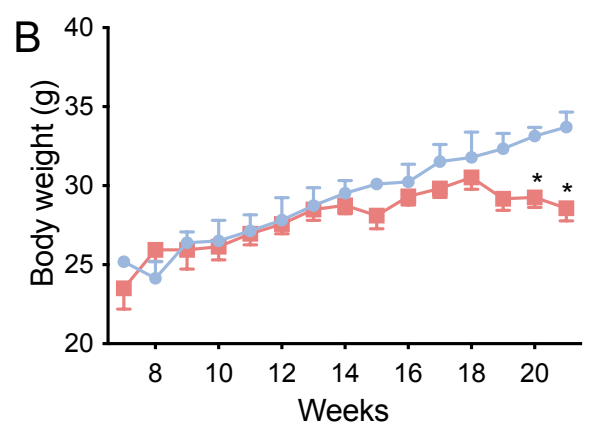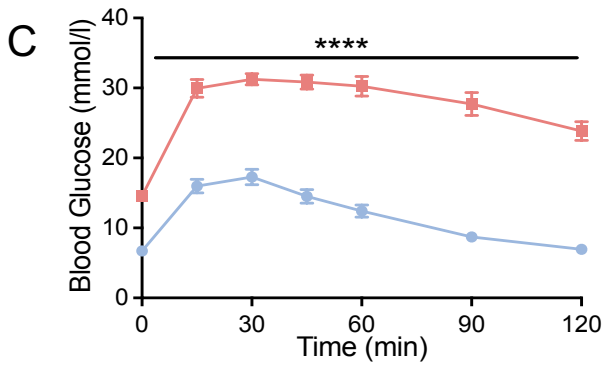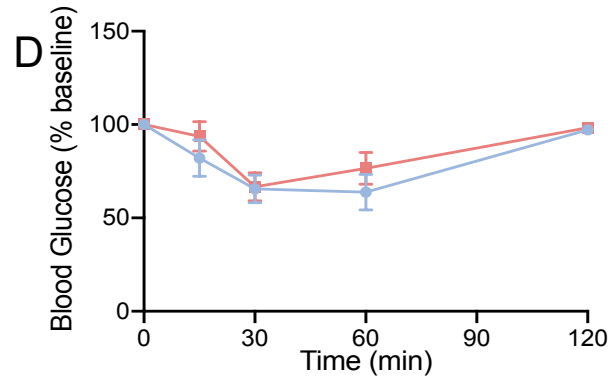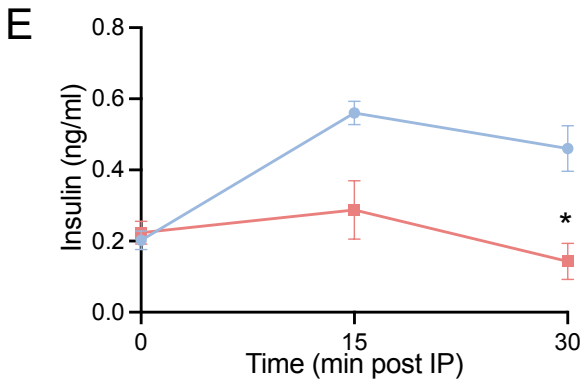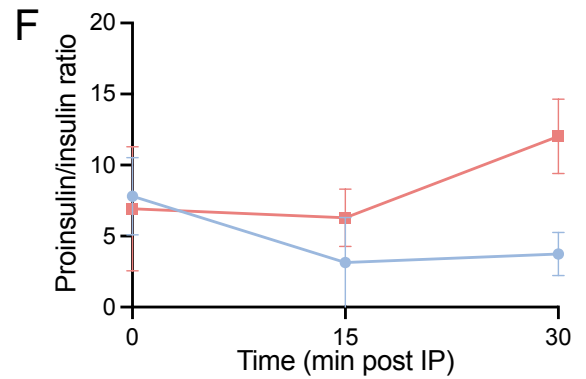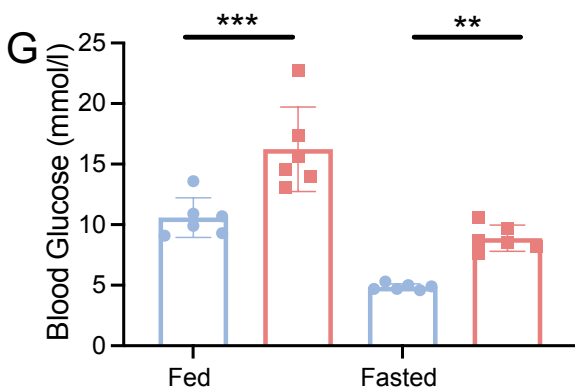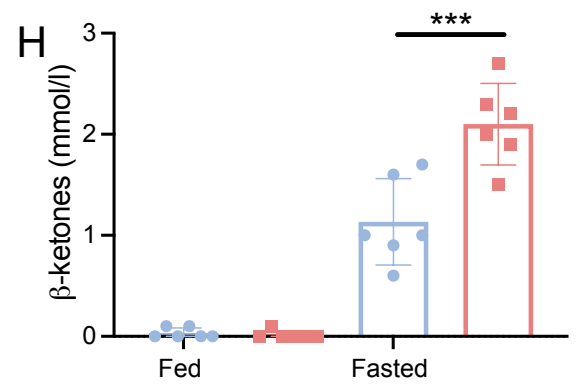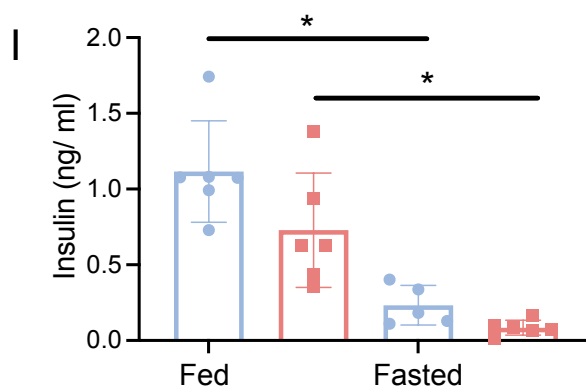

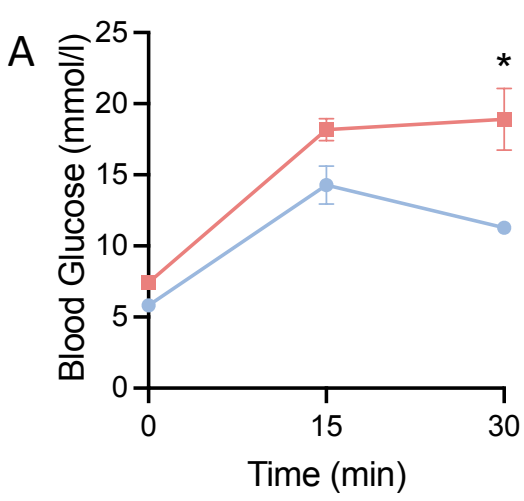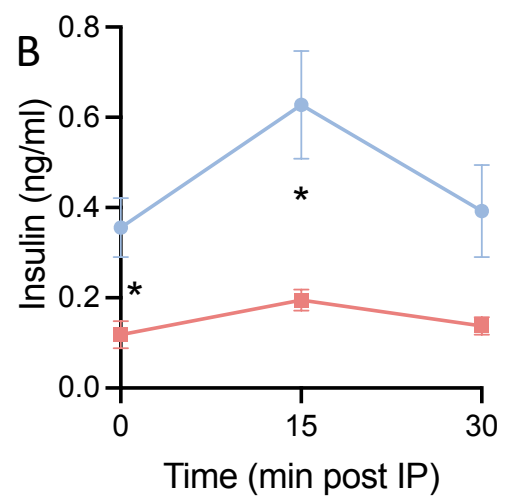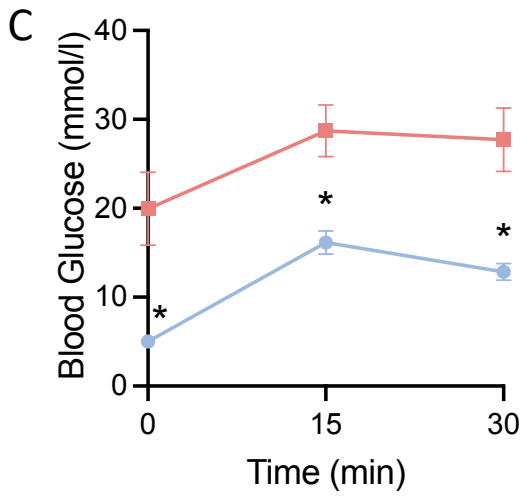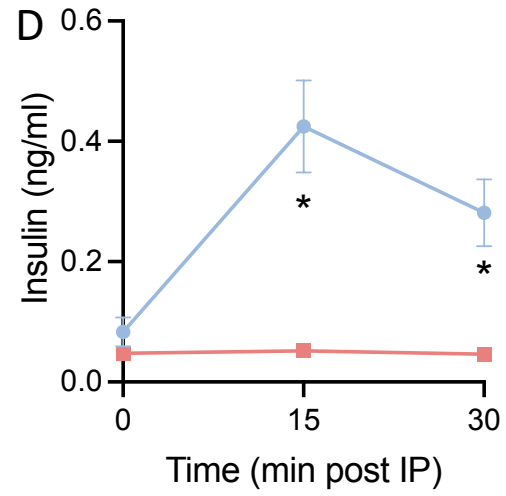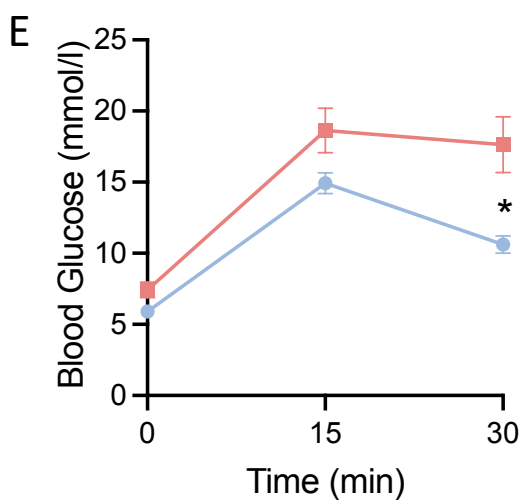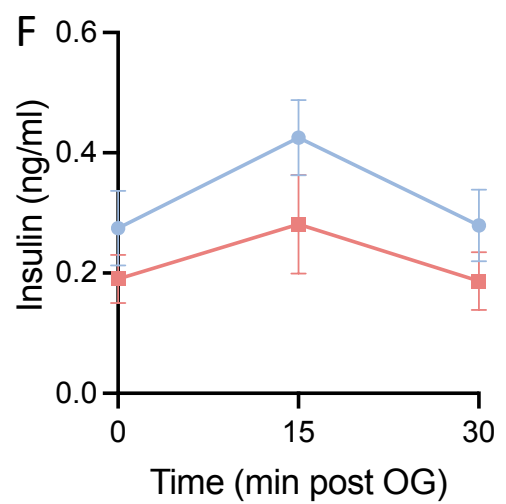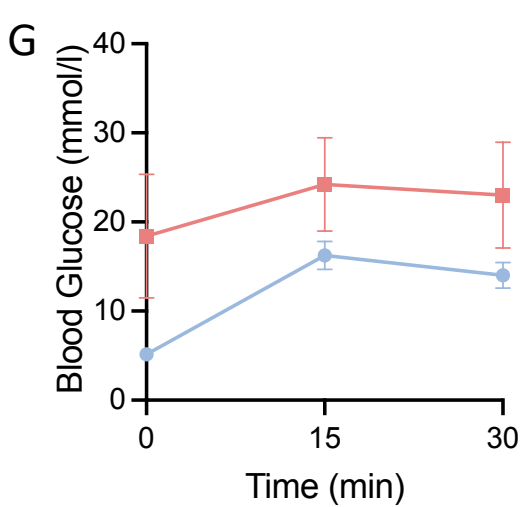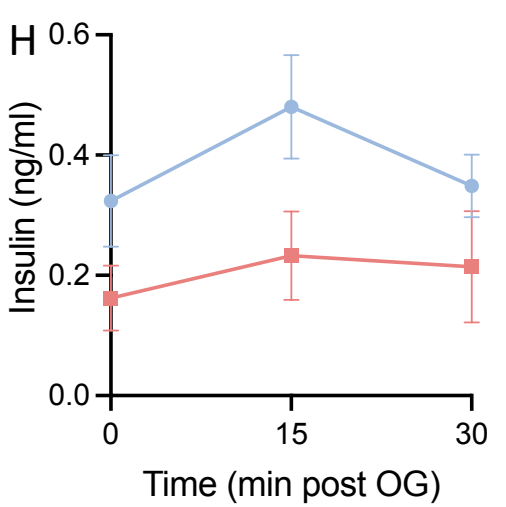

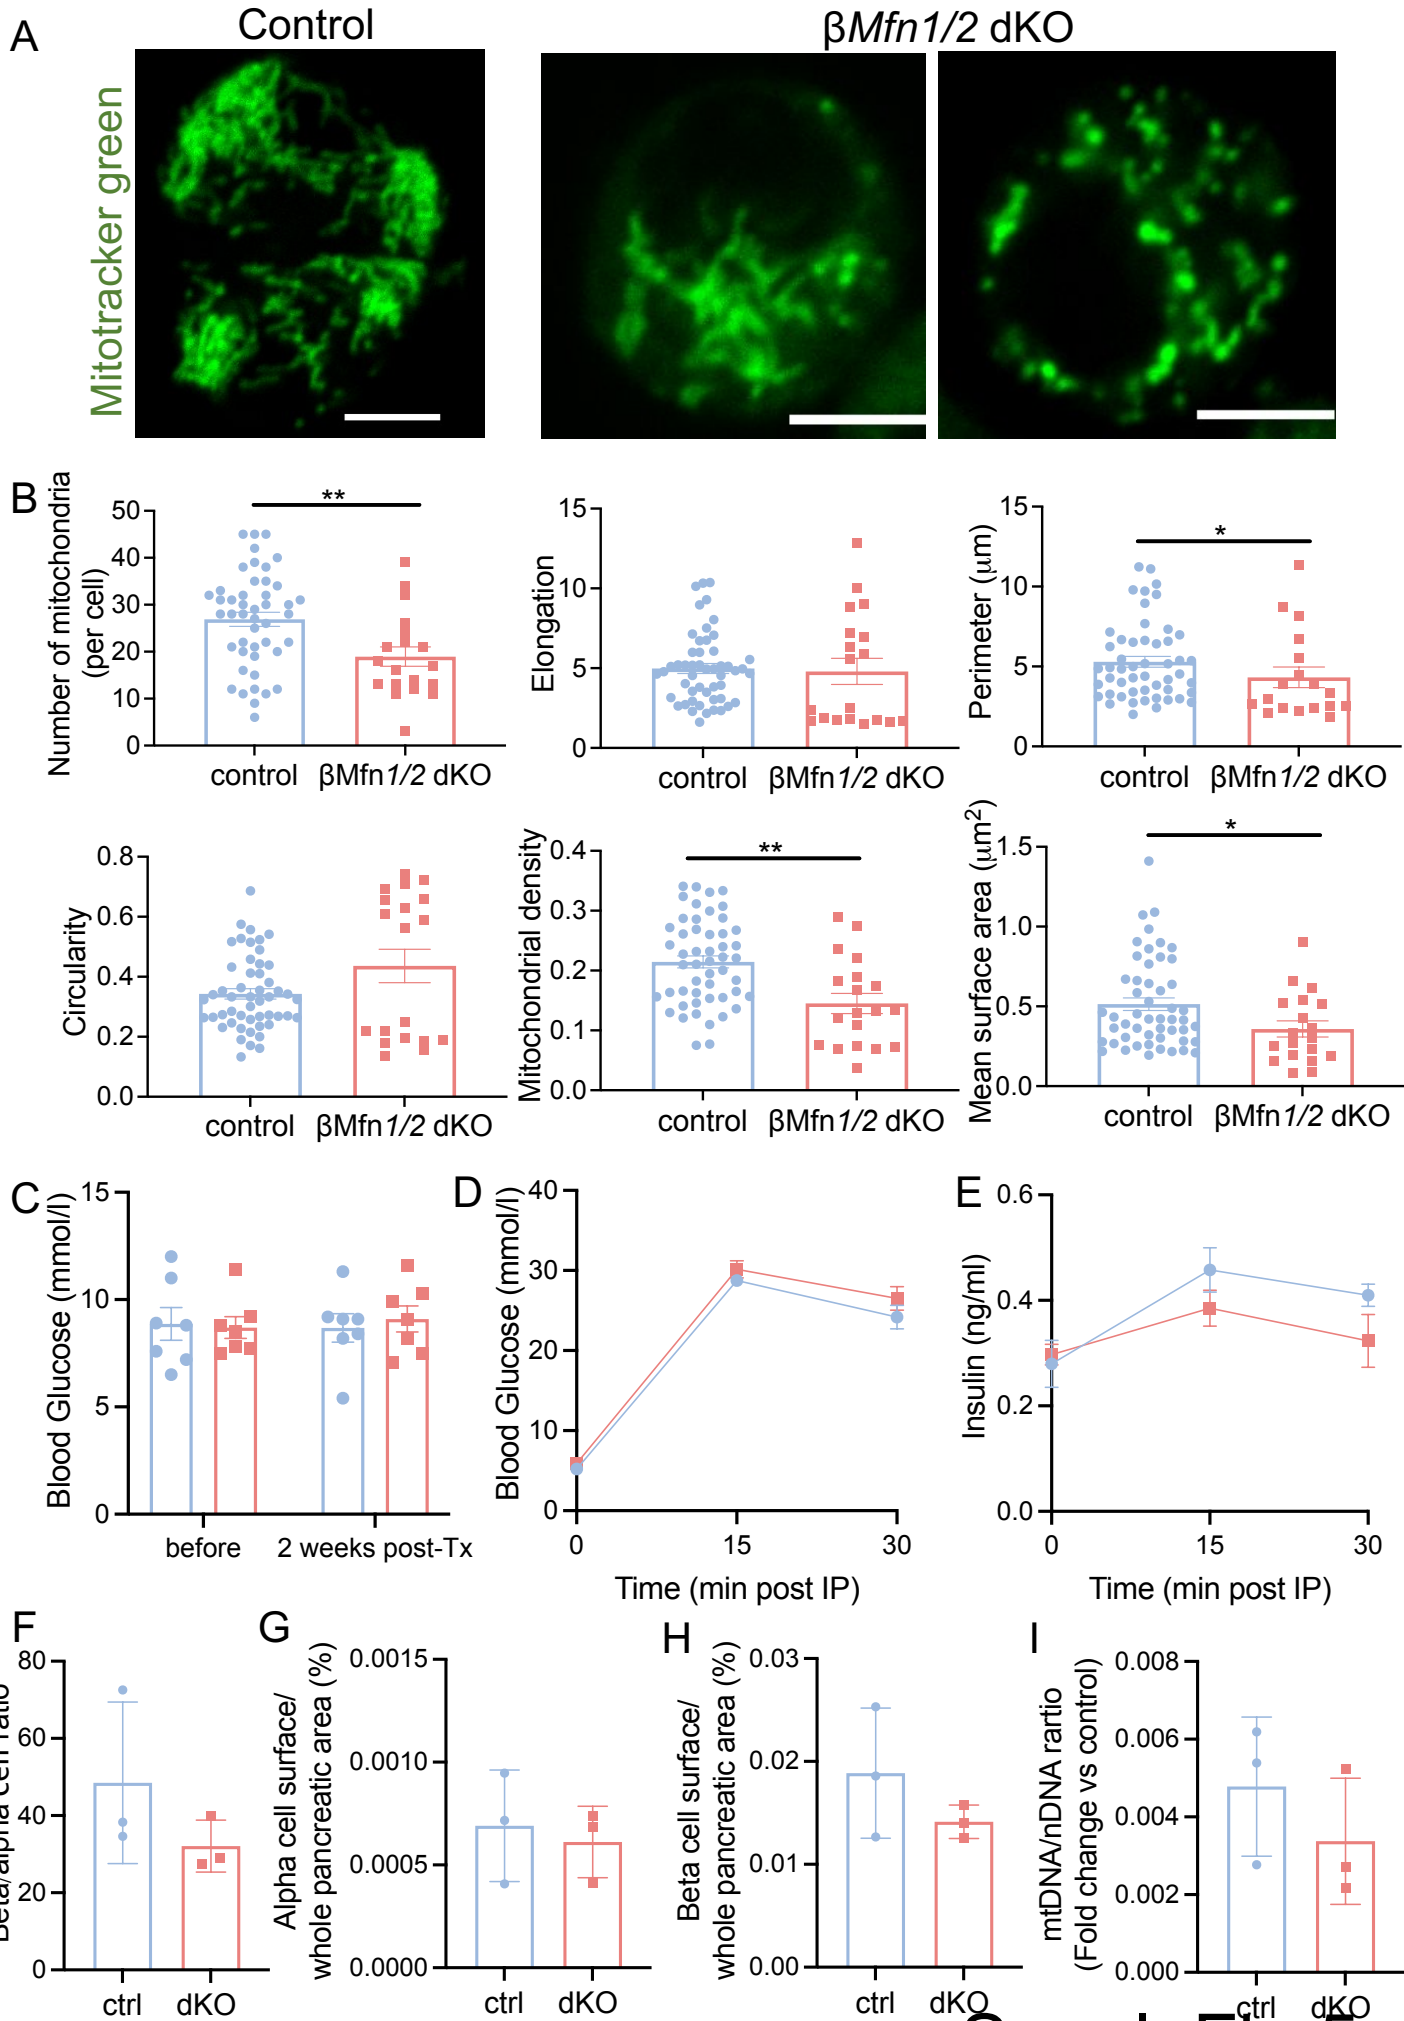

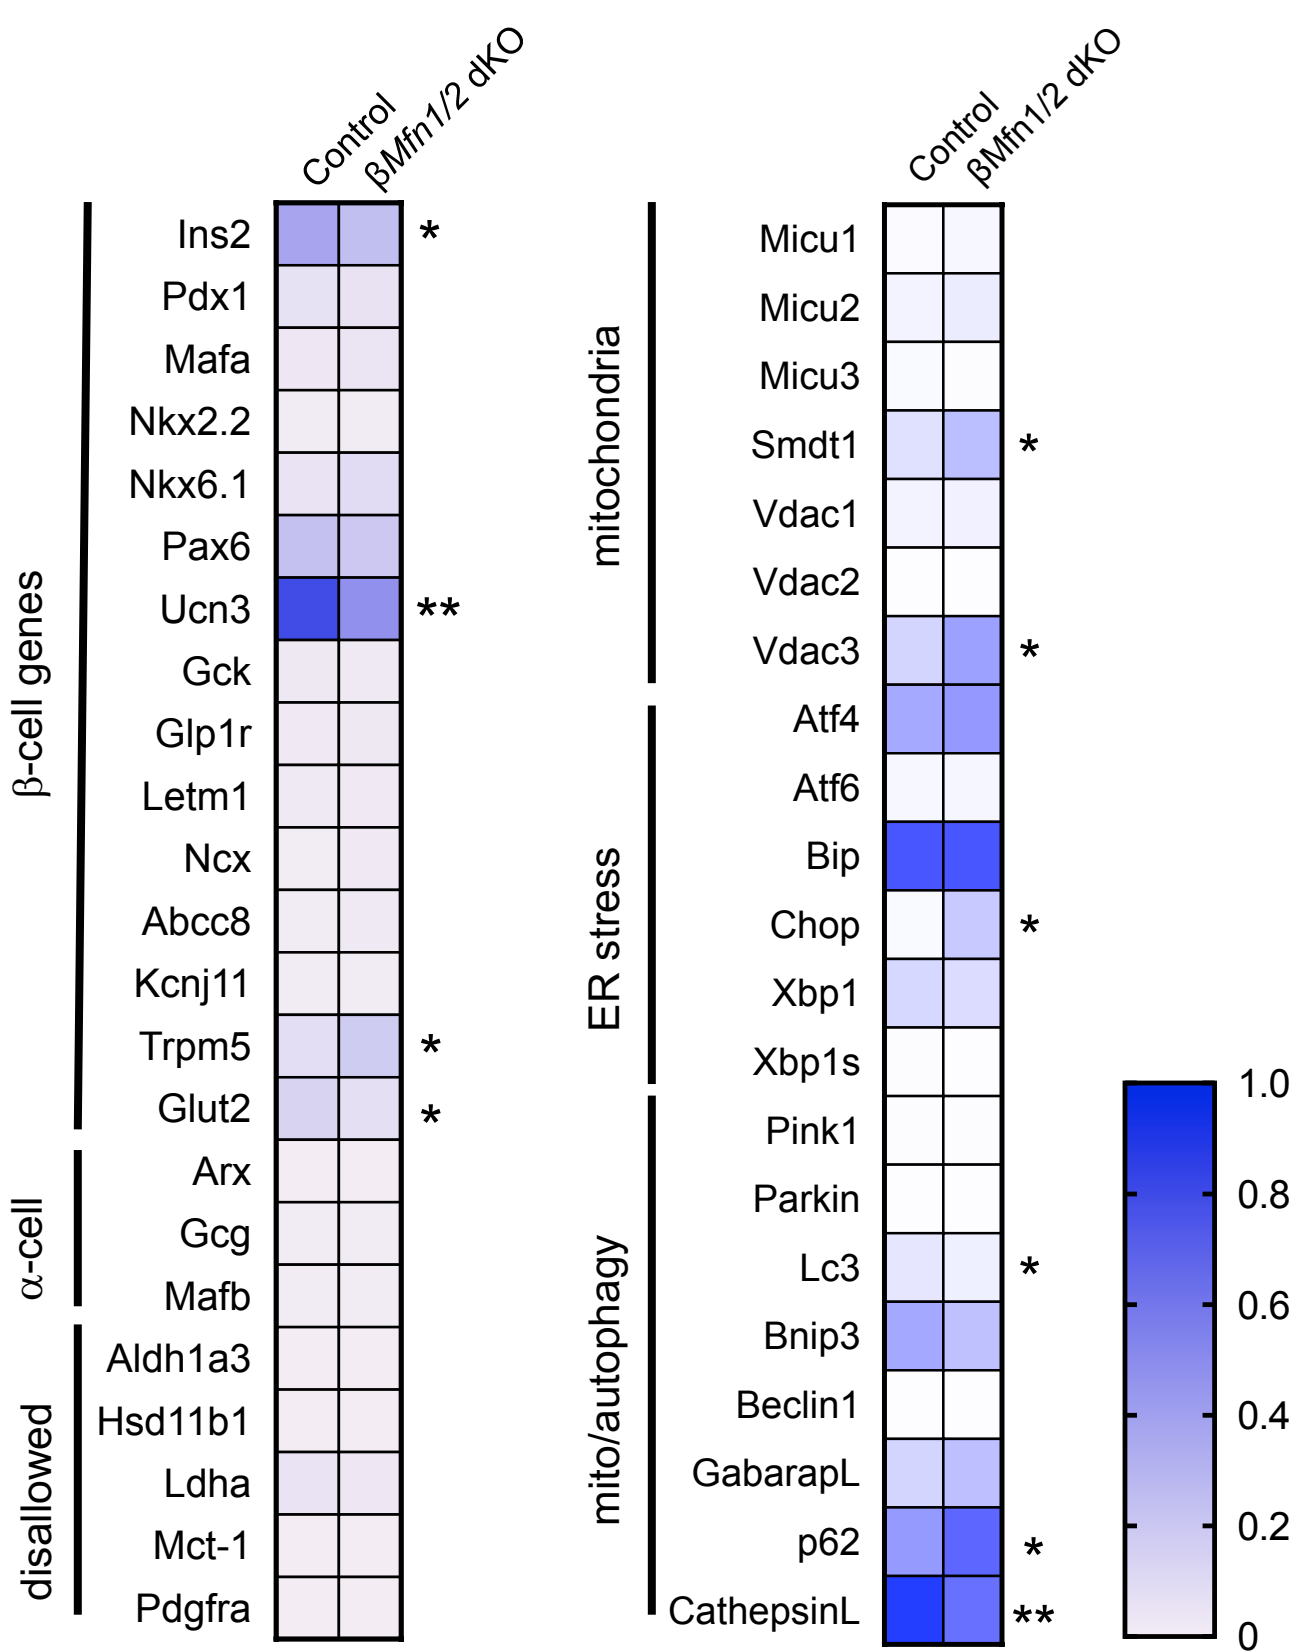

Suppl. Fig.6

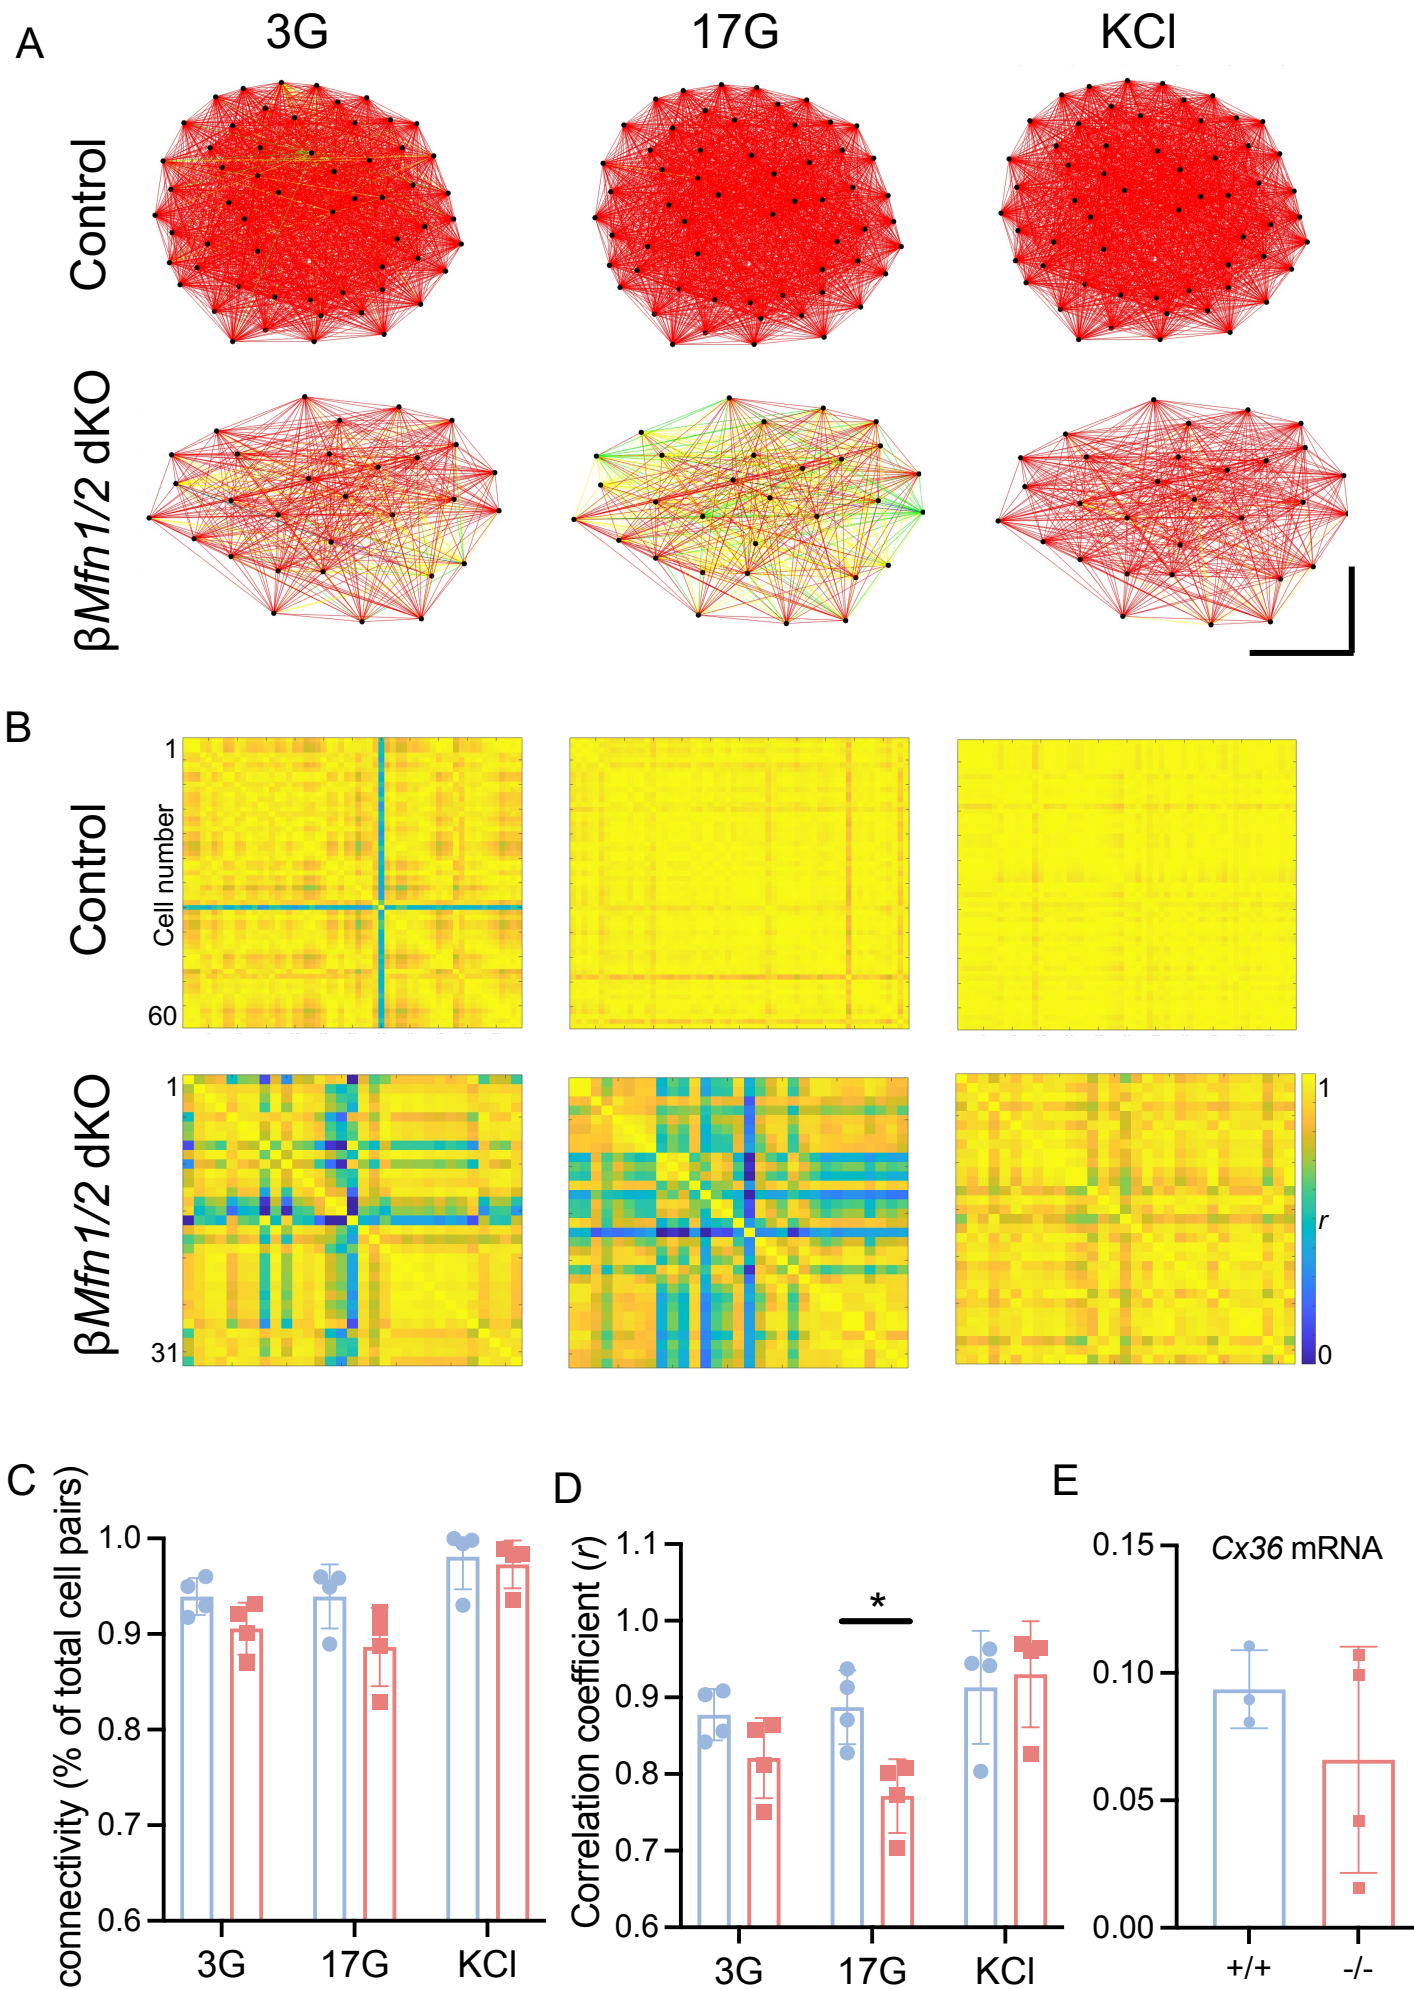

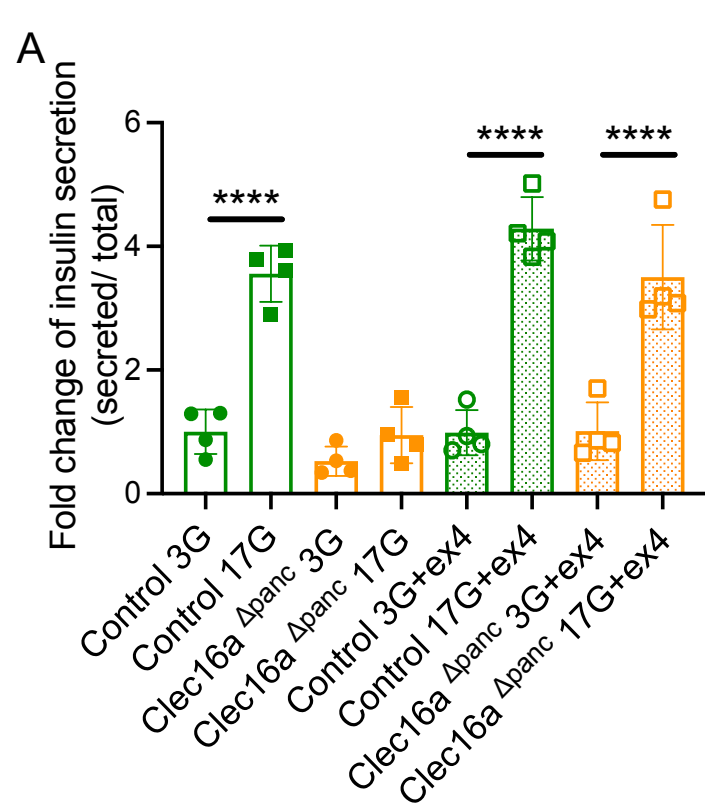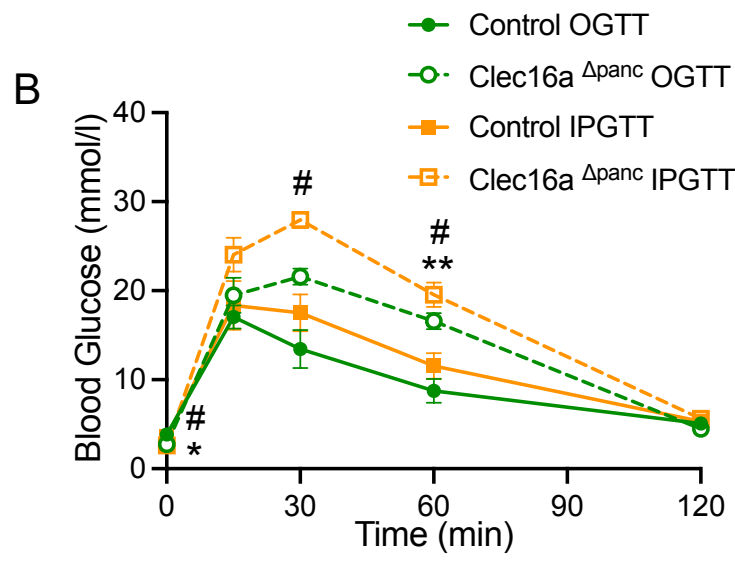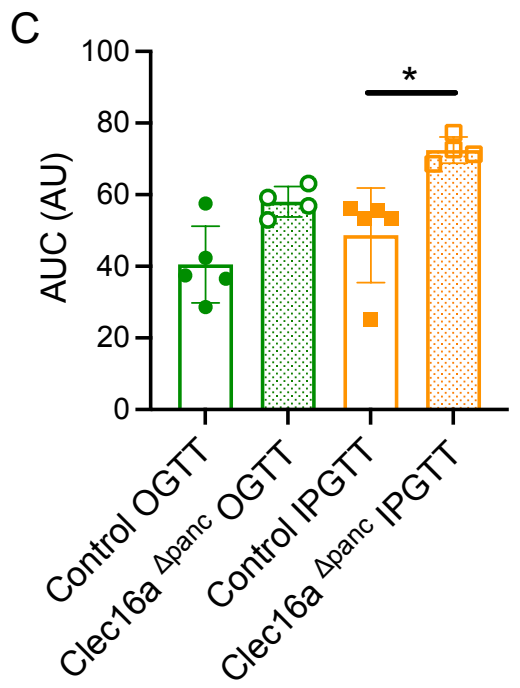

Suppl. Fig.8



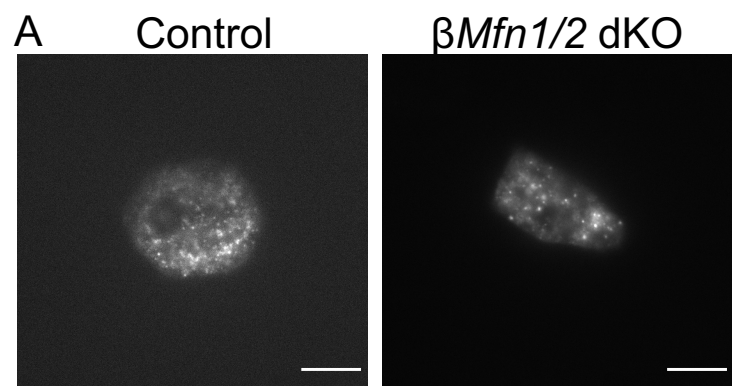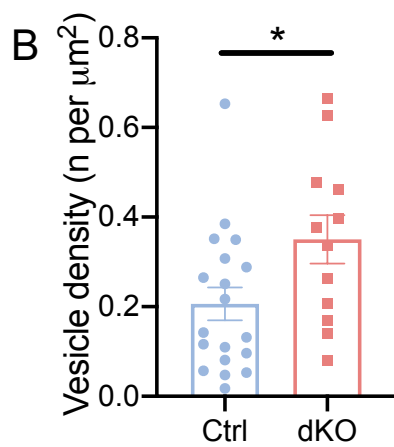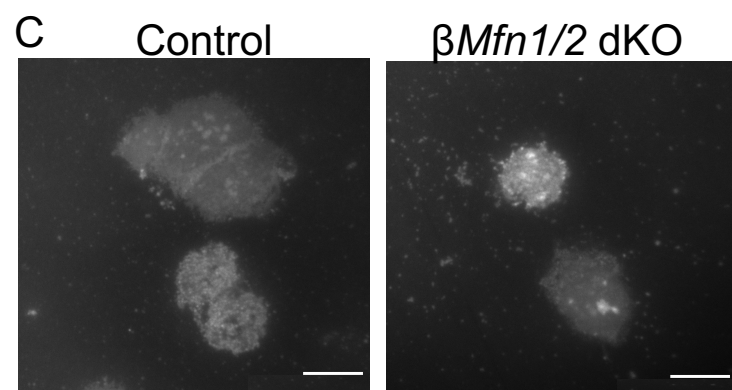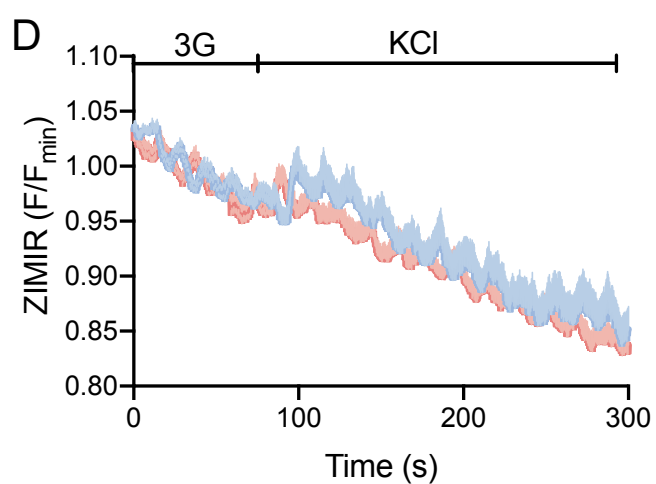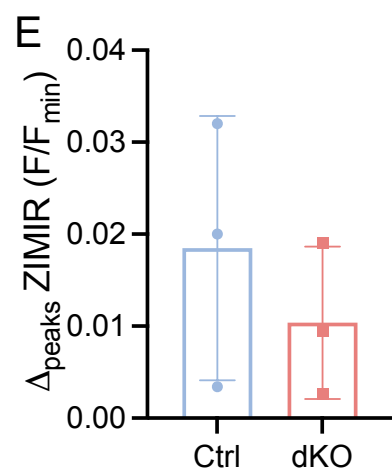

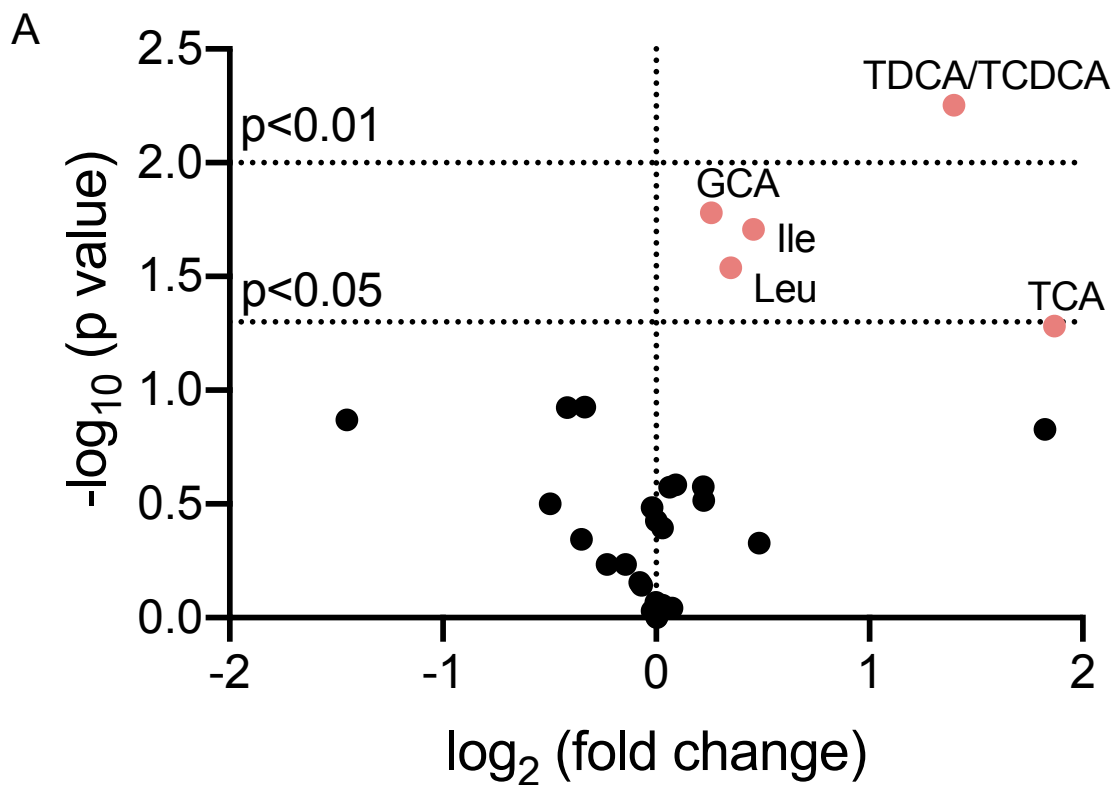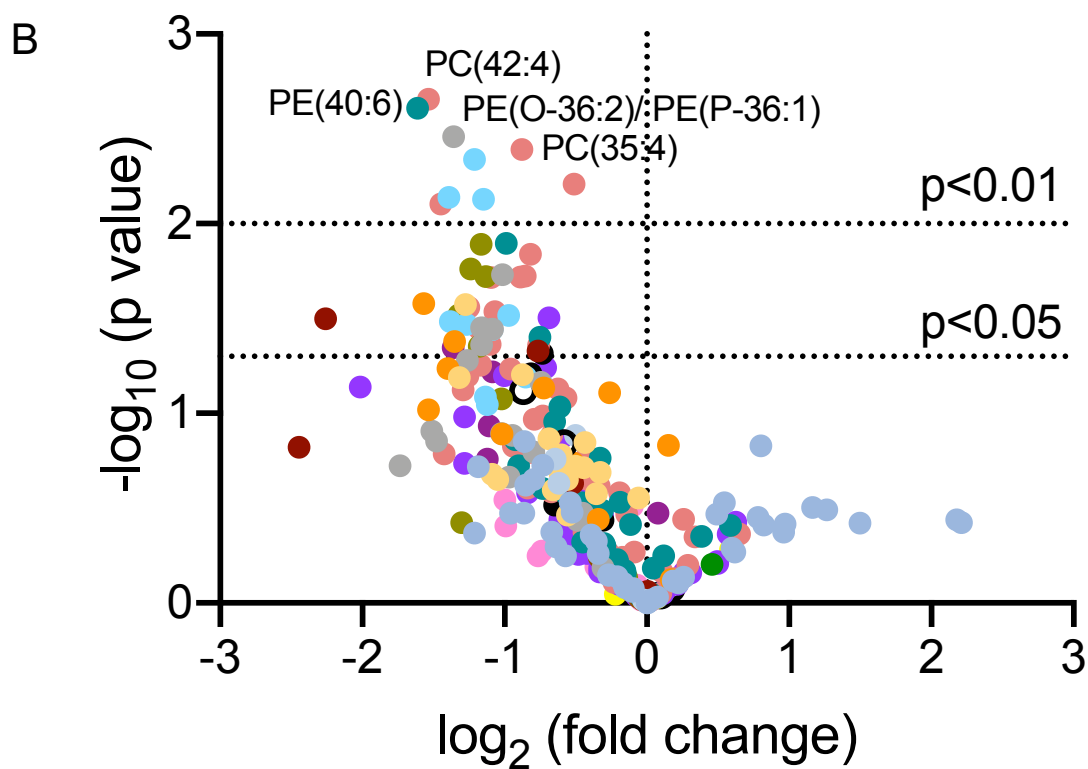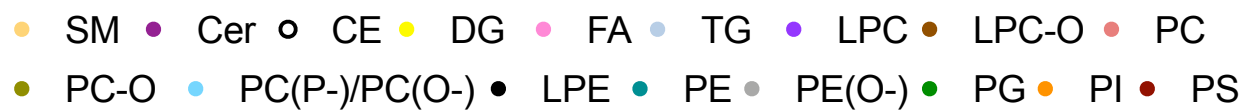

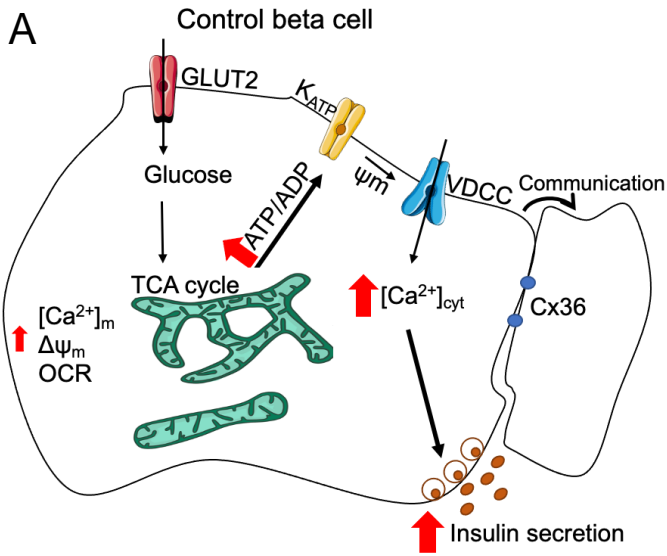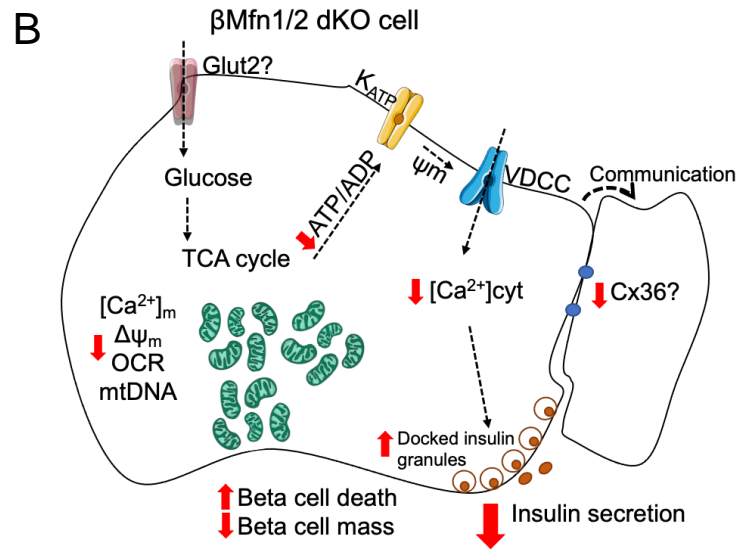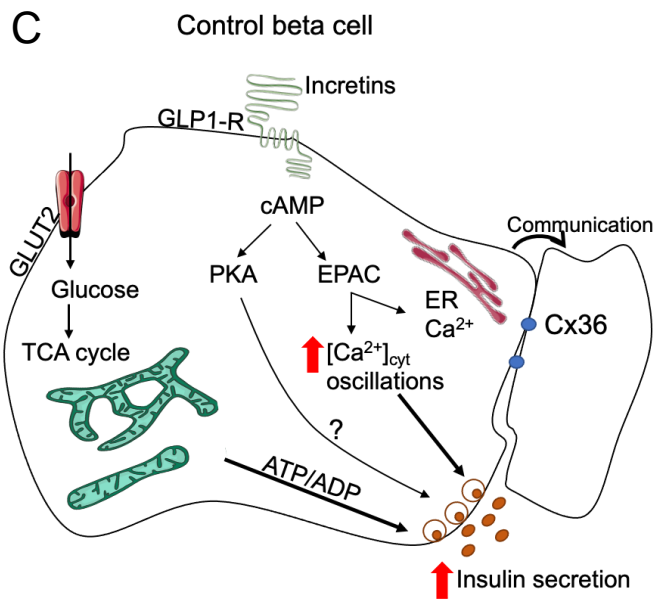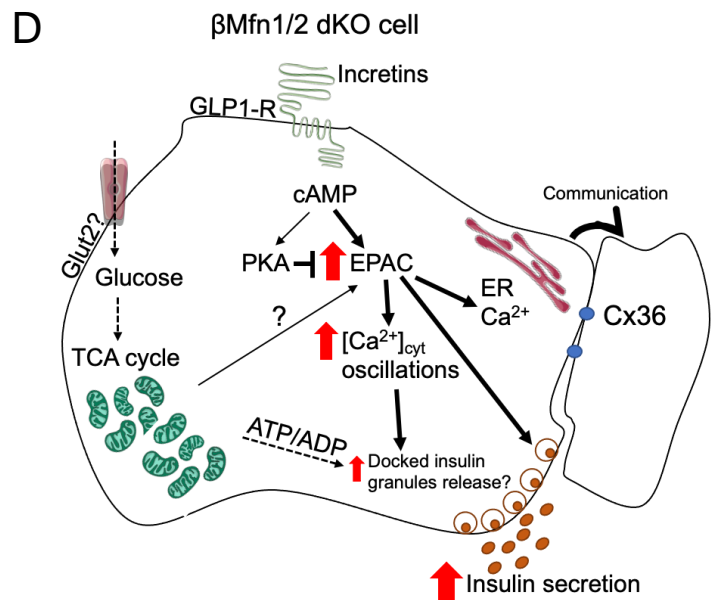

Supplement: Supplementary file 1 [file 1]
